# Supplementary material for: Inhibitory effects of high stability fucoxanthin on palmitic acid-induced lipid accumulation in human adipose-derived stem cells through modulation of long non-coding RNA
Source: Royal Society of Chemistry journal article supplement (doi:10.1039/c5fo00301f), 2015-01-01
Supplement: c5fo00301f1.pdf [file c5fo00301f1.pdf]

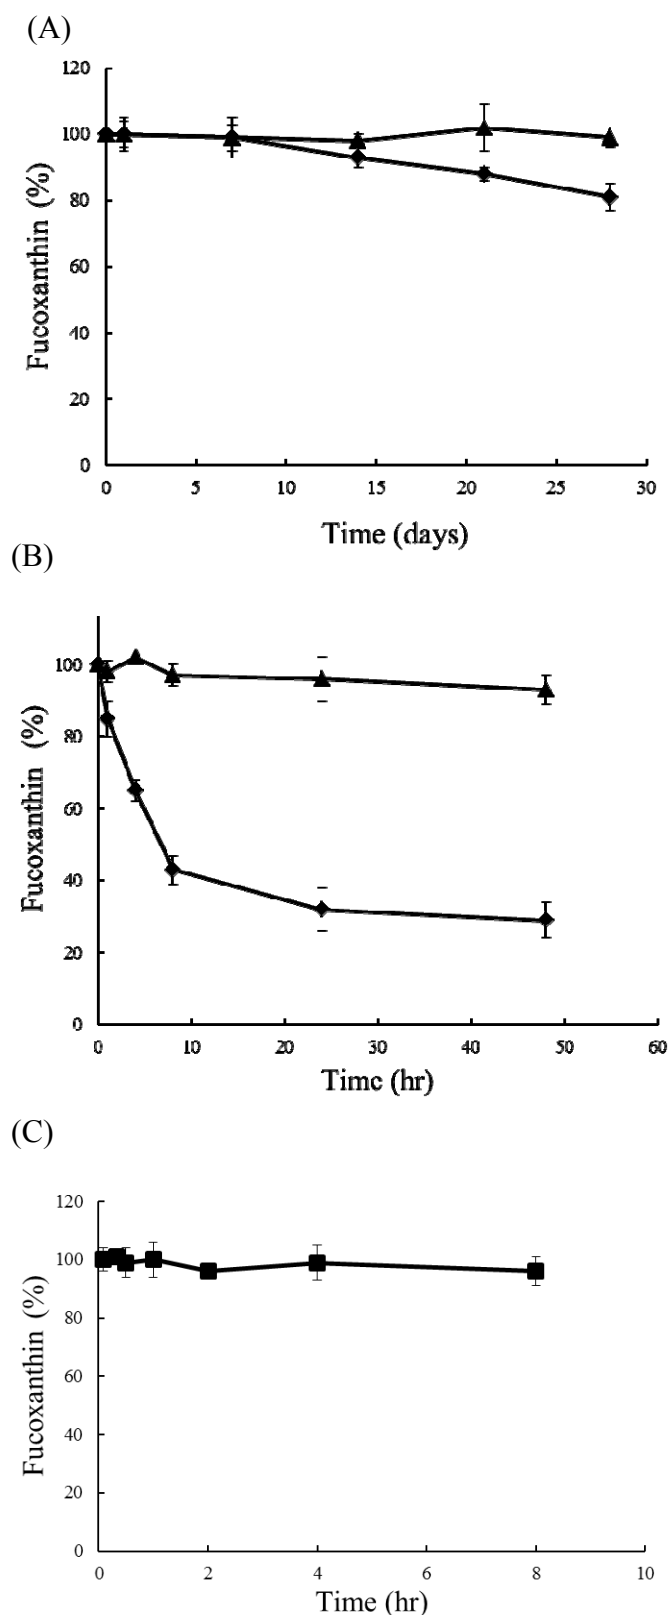

Fig S. Effect of temperature on fucoxanthin degradation. Fucoxanthin standard (◆) and high stability fucoxanthin (HS-Fx, ▲ or ■) were incubated on  $-20^{\circ}\text{C}$  (A),  $4^{\circ}\text{C}$  (B) and room temperature (C) for indicated time. Fucoxanthin content was examined by HPLC. Data were from three independent experiments.
